# Supplementary material
Source: PubMed Central journal article supplement (PMC2683971)
Supplement: NIHMS107088-supplement-3_data.pdf [file NIHMS107088-supplement-3_data.pdf]

| Dose Date | Sample Date | Day* | Ratio**  | AMS Error*** | Treatment     |
|-----------|-------------|------|----------|--------------|---------------|
| 2/9/2001  | 4/30/2001   | 81   | 1.40E+06 | 6.46E+04     | None          |
| 2/9/2001  | 5/9/2001    | 90   | 1.12E+06 | 6.00E+04     | None          |
| 2/9/2001  | 5/19/2001   | 100  | 1.11E+06 | 1.37E+05     | None          |
| 2/9/2001  | 5/29/2001   | 110  | 7.45E+05 | 2.75E+04     | None          |
| 2/9/2001  | 6/10/2001   | 122  | 6.90E+05 | 1.93E+05     | None          |
| 2/9/2001  | 6/18/2001   | 130  | 6.36E+05 | 1.95E+05     | Pre_Tr_t_0    |
| 2/9/2001  | 6/28/2001   | 140  | 5.75E+05 | 2.83E+04     | Pre_Tr_t_0    |
| 2/9/2001  | 7/9/2001    | 151  | 6.14E+05 | 5.65E+04     | Pre_Tr_t_0    |
| 2/9/2001  | 7/18/2001   | 160  | 5.13E+05 | 3.39E+04     | Pre_Tr_t_0    |
| 2/9/2001  | 7/25/2001   | 167  | 4.51E+05 | 2.83E+04     | Pre_Tr_t_0    |
| 2/9/2001  | 9/25/2001   | 229  | 3.99E+05 | 2.20E+04     | Treatment_0   |
| 2/9/2001  | 10/4/2001   | 238  | 3.48E+05 | 1.50E+04     | Treatment_0   |
| 2/9/2001  | 10/15/2001  | 249  | 2.58E+05 | 3.90E+04     | Treatment_0   |
| 2/9/2001  | 10/25/2001  | 259  | 2.15E+05 | 1.50E+04     | Treatment_0   |
| 2/9/2001  | 11/2/2001   | 267  | 2.84E+05 | 1.20E+04     | Treatment_0   |
| 2/9/2001  | 11/14/2001  | 279  | 2.55E+05 | 1.20E+04     | Pre_Tr_t_97   |
| 2/9/2001  | 11/25/2001  | 290  | 2.17E+05 | 1.00E+04     | Pre_Tr_t_97   |
| 2/9/2001  | 12/5/2001   | 300  | 1.99E+05 | 1.10E+04     | Pre_Tr_t_97   |
| 2/9/2001  | 12/16/2001  | 311  | 2.04E+05 | 1.90E+04     | Pre_Tr_t_97   |
| 2/9/2001  | 1/17/2002   | 343  | 1.98E+05 | 1.50E+04     | Pre_Tr_t_97   |
| 2/9/2001  | 1/28/2002   | 354  | 1.94E+05 | 5.30E+03     | Treatment_97  |
| 2/9/2001  | 2/6/2002    | 363  | 1.82E+05 | 1.00E+04     | Treatment_97  |
| 2/9/2001  | 2/16/2002   | 373  | 1.99E+05 | 1.00E+04     | Treatment_97  |
| 2/9/2001  | 2/26/2002   | 383  | 1.56E+05 | 1.10E+04     | Treatment_97  |
| 2/9/2001  | 3/7/2002    | 392  | 1.79E+05 | 1.20E+04     | Treatment_97  |
| 2/9/2001  | 3/28/2002   | 413  | 1.73E+05 | 5.50E+03     | Pre_Tr_t_135  |
| 2/9/2001  | 4/7/2002    | 423  | 1.40E+05 | 7.00E+03     | Pre_Tr_t_135  |
| 2/9/2001  | 4/17/2002   | 433  | 1.68E+05 | 7.00E+03     | Pre_Tr_t_135  |
| 2/9/2001  | 4/27/2002   | 443  | 1.76E+05 | 7.00E+03     | Pre_Tr_t_135  |
| 2/9/2001  | 5/7/2002    | 453  | 1.59E+05 | 8.00E+03     | Treatment_135 |
| 2/9/2001  | 5/18/2002   | 464  | 2.24E+05 | 1.10E+04     | Treatment_135 |
| 2/9/2001  | 5/28/2002   | 474  | 1.52E+05 | 1.30E+04     | Treatment_135 |
| 2/9/2001  | 6/6/2002    | 483  | 1.45E+05 | 8.00E+03     | Treatment_135 |
| 2/9/2001  | 6/17/2002   | 494  | 1.34E+05 | 9.00E+03     | Treatment_135 |
| 2/9/2001  | 6/26/2002   | 503  | 1.33E+05 | 5.20E+03     | None          |
| 2/9/2001  | 7/7/2002    | 514  | 1.22E+05 | 9.00E+03     | None          |
| 2/9/2001  | 7/17/2002   | 524  | 1.26E+05 | 7.00E+03     | None          |
| 2/9/2001  | 7/28/2002   | 535  | 1.28E+05 | 9.00E+03     | None          |
| 2/9/2001  | 8/8/2002    | 546  | 1.37E+05 | 1.60E+04     | None          |

\* the number of days post dose is calculated relative to the dose date 2/9/2001 (one time dose of 0.1 micro Ci of Ca-41)

\*\* the Ca-41 to Ca ratio is multiplied by a factor of  $10^{15}$  for convenience

\*\*\* the AMS error is quite simply treated as part of the random variation in the Ca-41 to Ca ratio in the statistical model
